# Supplementary material
Source: MDPI journal article supplement (https://www.mdpi.com/2075-1702/11/4/474)
Supplement: s1 [file s1]

# Supplementary Materials: A simple semi-analytical method for solving axisymmetric contact problems involving bonded and unbonded layers of arbitrary thickness

Fabian Forsbach <sup>1</sup> 

## Normalized contact solution of a cylindrical flat punch and bonded or unbonded layer: Explanation of the provided .mat-files

The BEM results of the normalized contact stiffness  $\bar{k}_N(a/h)$  and the normalized pressure distribution  $\bar{p}(r/a, a/h)$  needed for the evaluation of Eqs. (4), (10) and (11) in the main text are provided in the supplemented .mat-files. All files contain the four arrays:

- "a\_h" - one-dimensional array of the confinement ratio  $a/h$
- "r\_a" - one-dimensional array of the normalized radius  $r/a$
- "kN\_norm" - one-dimensional array of the normalized contact stiffness  $\bar{k}_N(a/h)$
- "p\_norm" - two-dimensional array of the normalized radius  $\bar{p}(r/a, a/h)$

For the bonded layer, the quantities further depend on the Poisson's ratio  $\nu$  (see main text). We provided data for  $\nu = \{0.0, 0.3, 0.4, 0.45, 0.49, 0.5\}$ .

We additionally provide the dimensionless parameters  $m$  and  $\kappa$  according to the contact stiffness representation in Eq. (32) of the main text:

- "m" - one-dimensional array of the exponent  $m(a/h)$  in Eq. (32) as defined by Eq. (33)
- "kappa" - one-dimensional array of the dimensionless parameter  $\kappa(a/h)$

These parameters are generally not needed for the contact solution, but may facilitate the solution for parabolic indenters.
